# Supplementary material for: Live-cell single particle imaging reveals the role of RNA polymerase II in histone H2A.Z eviction
Source: eLife journal article supplement (doi:10.7554/elife.55667), 2020-04-27
Supplement: supp [file elife-55667-supp-v1.zip]

**A**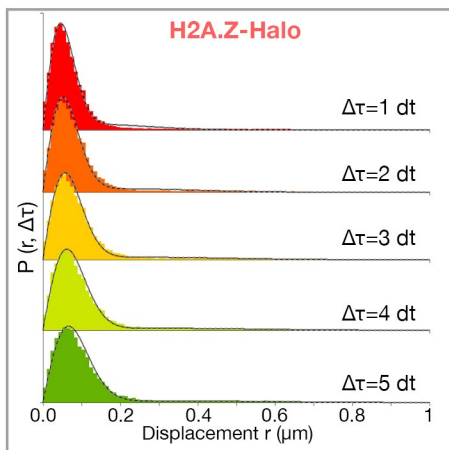**C**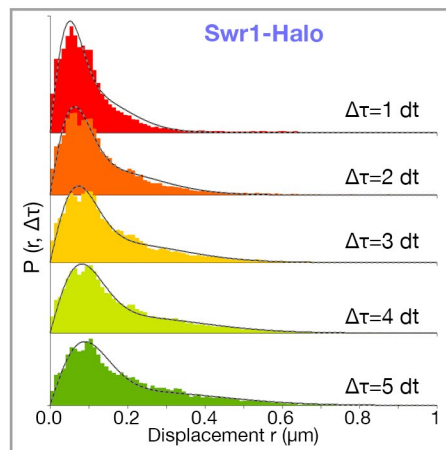**B**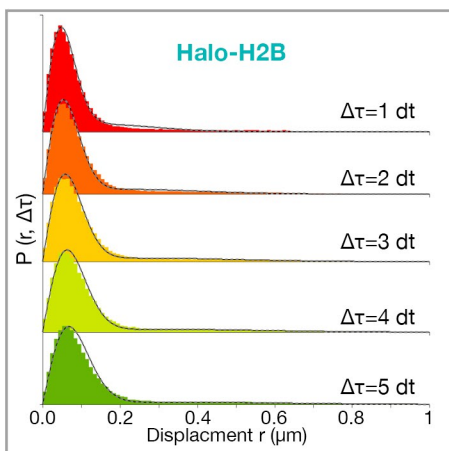**D**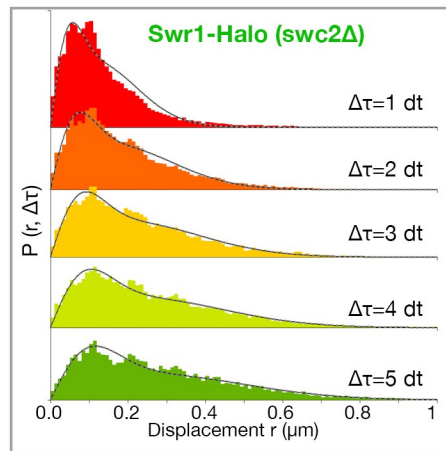**E**

|                 | MSD                                          |                                             |                  | Spot-On                                      |                                             |                 |
|-----------------|----------------------------------------------|---------------------------------------------|------------------|----------------------------------------------|---------------------------------------------|-----------------|
|                 | D bound<br>( $\mu\text{m}^2 \text{s}^{-1}$ ) | D free<br>( $\mu\text{m}^2 \text{s}^{-1}$ ) | % bound          | D bound<br>( $\mu\text{m}^2 \text{s}^{-1}$ ) | D free<br>( $\mu\text{m}^2 \text{s}^{-1}$ ) | % bound         |
| H2A.Z           | $0.056 \pm 0.002$                            | $0.886 \pm 0.066$                           | $80.5 \pm 1.54$  | $0.029 \pm 0.0002$                           | $1.177 \pm 0.009$                           | $81.7 \pm 0.07$ |
| H2B             | $0.058 \pm 0.001$                            | $0.888 \pm 0.039$                           | $73.9 \pm 0.99$  | $0.028 \pm 0.0002$                           | $1.286 \pm 0.008$                           | $75.6 \pm 0.06$ |
| Swr1            | $0.082 \pm 0.028$                            | $0.419 \pm 0.066$                           | $39.7 \pm 14.07$ | $0.063 \pm 0.0003$                           | $0.618 \pm 0.002$                           | $47.2 \pm 0.11$ |
| Swr1<br>(swc2Δ) | $0.087 \pm 0.034$                            | $0.598 \pm 0.026$                           | $18.0 \pm 5.64$  | $0.070 \pm 0.0001$                           | $0.766 \pm 0.001$                           | $20.7 \pm 0.07$ |

**Fig. S1.2**
