# Supplementary figures and images for: Live-cell single particle imaging reveals the role of RNA polymerase II in histone H2A.Z eviction
Source: eLife journal article supplement (doi:10.7554/elife.55667), 2020-04-27

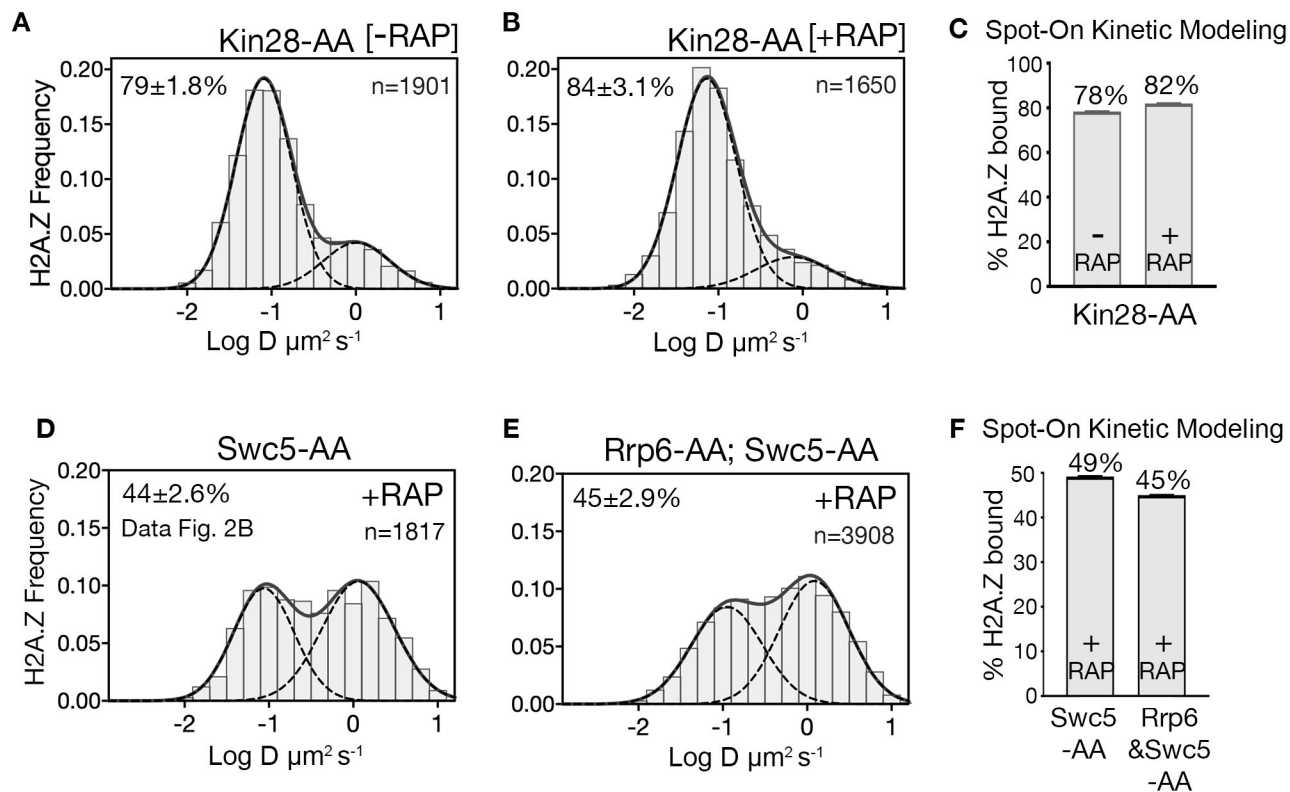

**Fig. S4.1**

Supplement: supp [file elife-55667-supp-v1.zip]

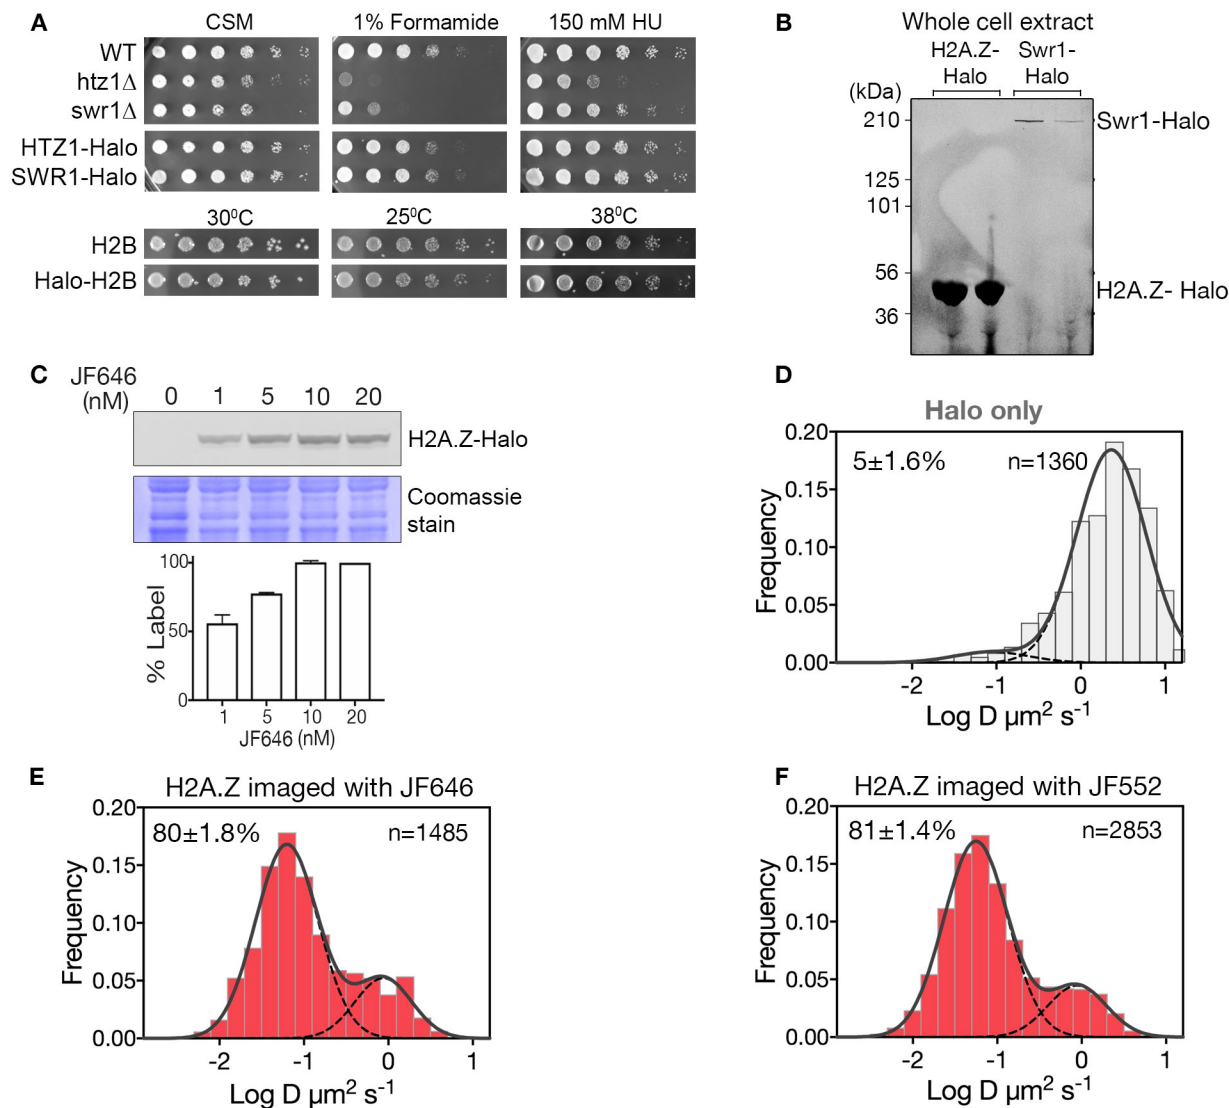

Fig. S1.1

Supplement: supp [file elife-55667-supp-v1.zip]

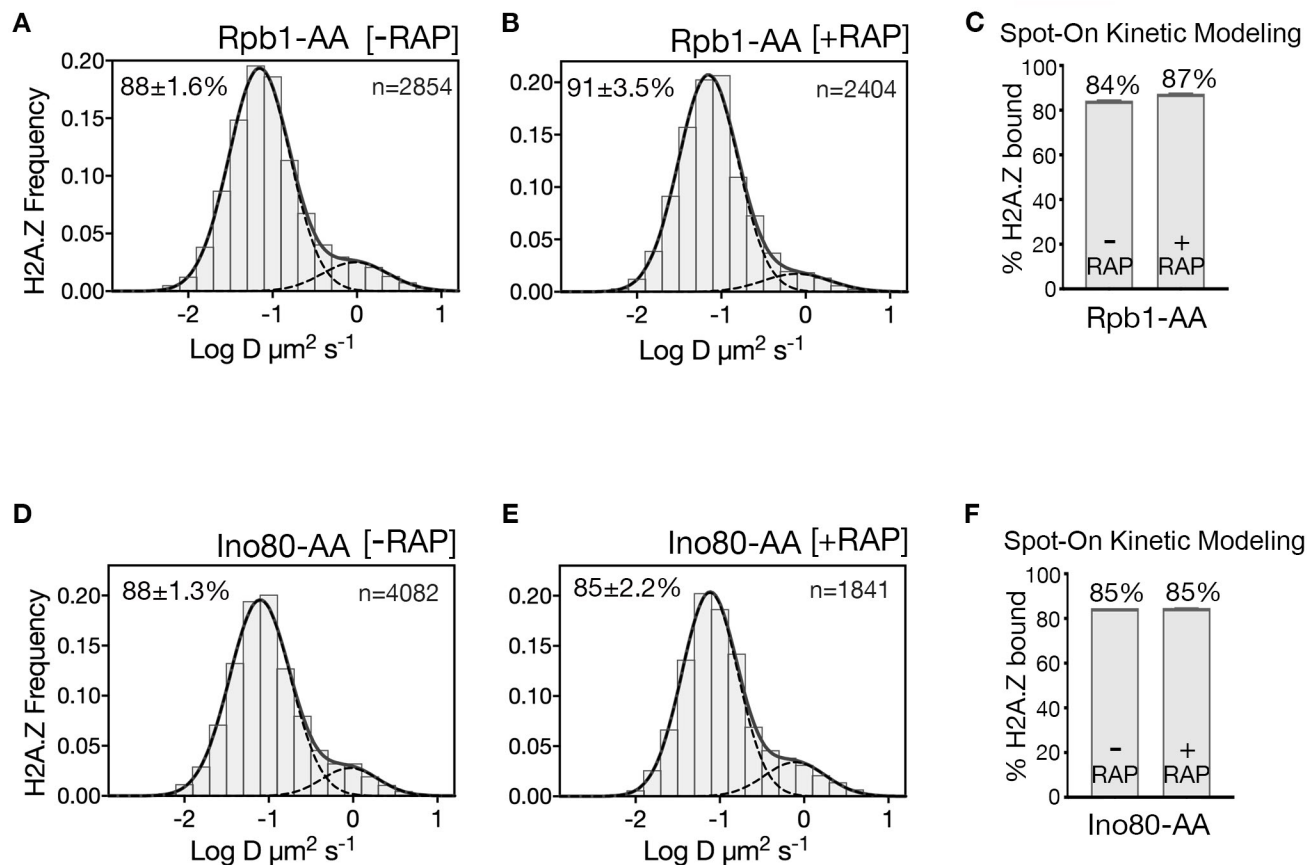

**Fig. S3.2**

Supplement: supp [file elife-55667-supp-v1.zip]

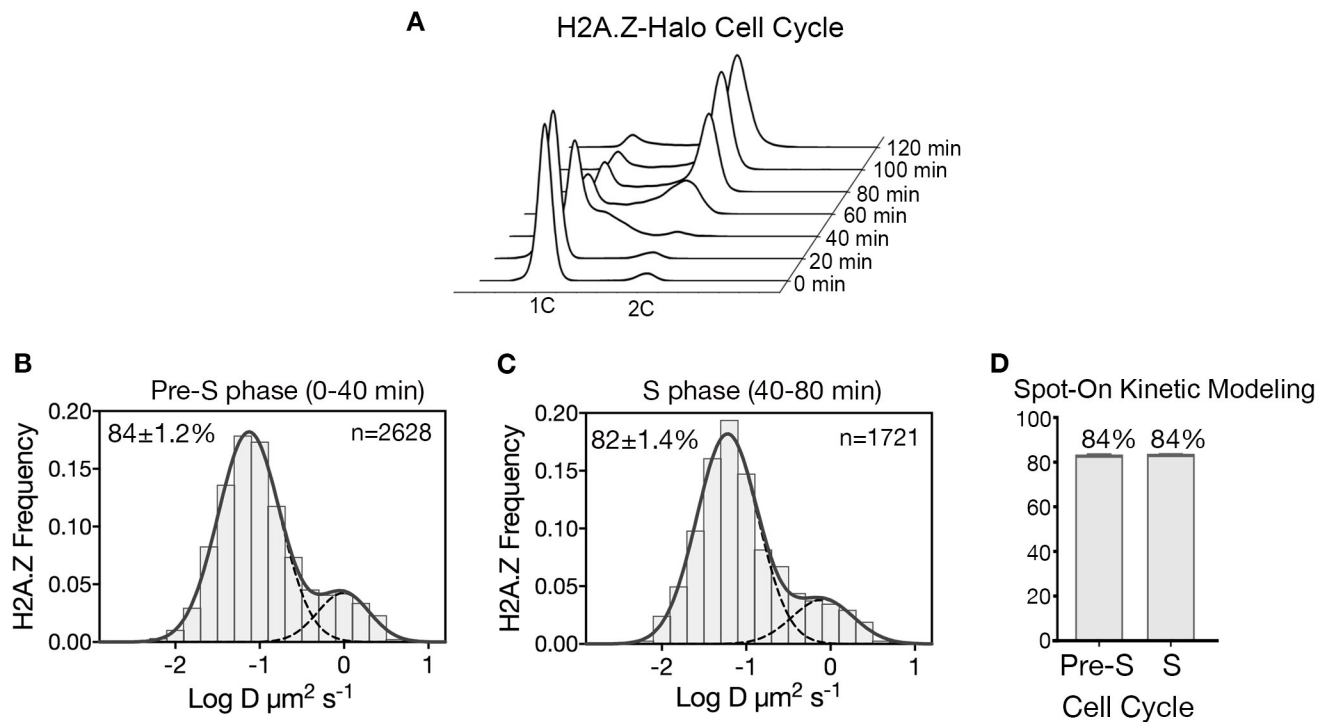

**Fig. S1.3**

Supplement: supp [file elife-55667-supp-v1.zip]

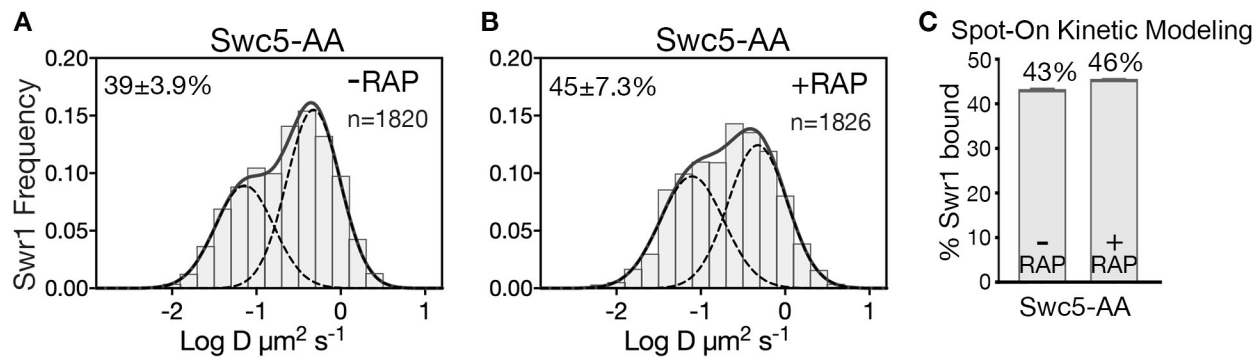

**Fig. S2.1**

Supplement: supp [file elife-55667-supp-v1.zip]

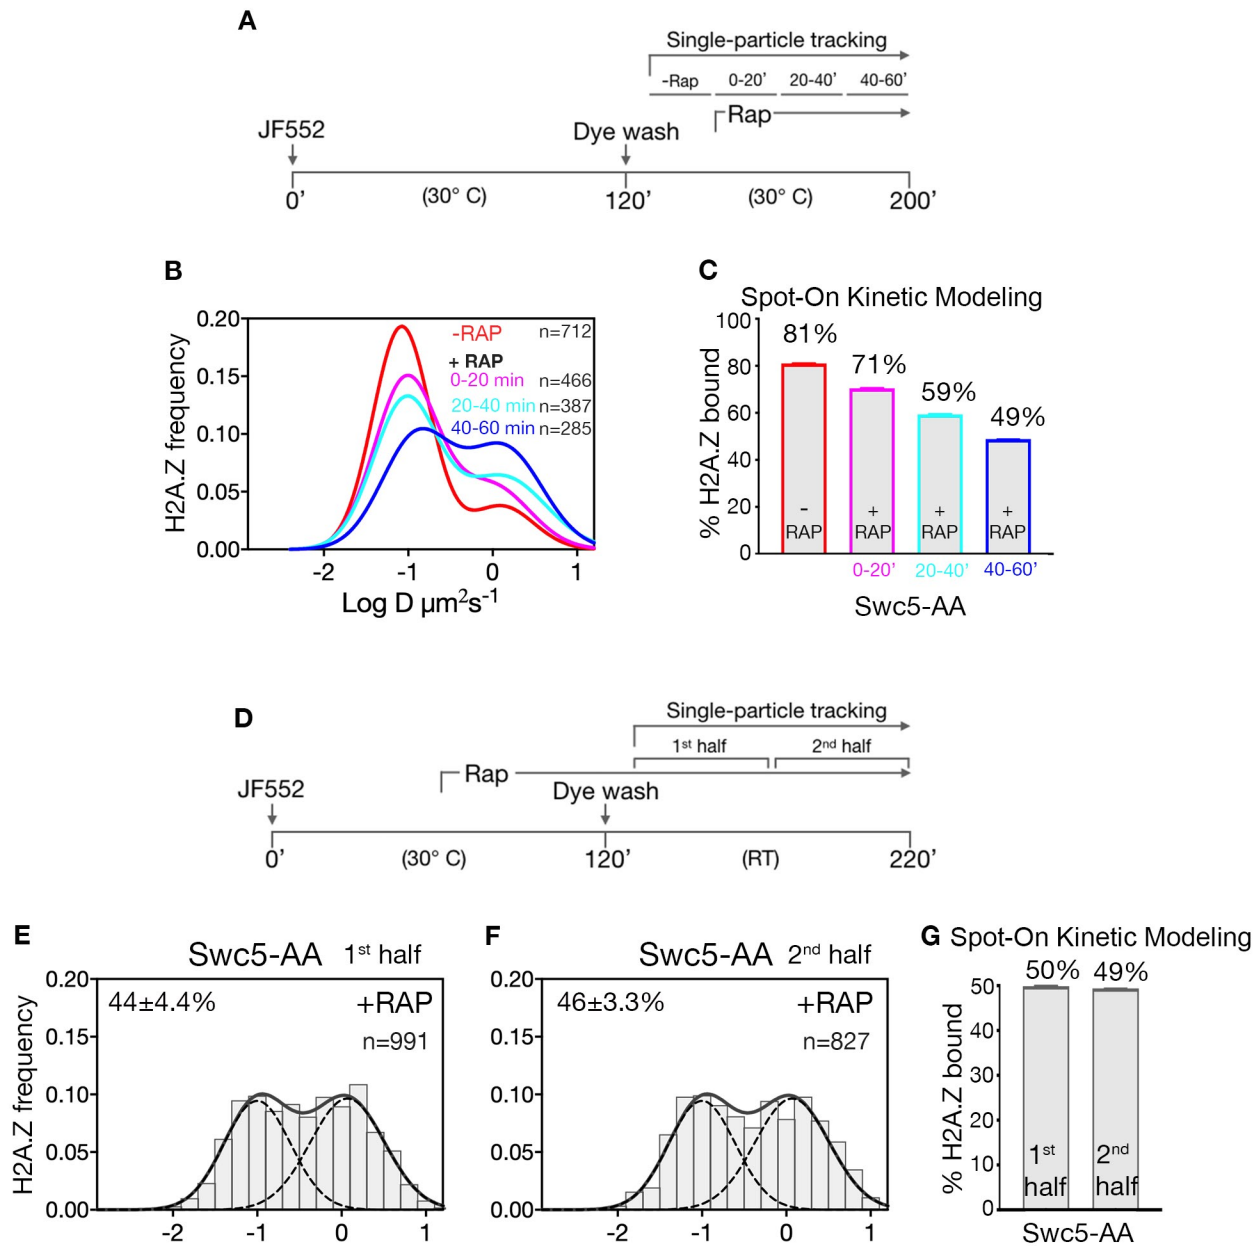

**Fig. S2.2**

Supplement: supp [file elife-55667-supp-v1.zip]

**A****Swc5-AA**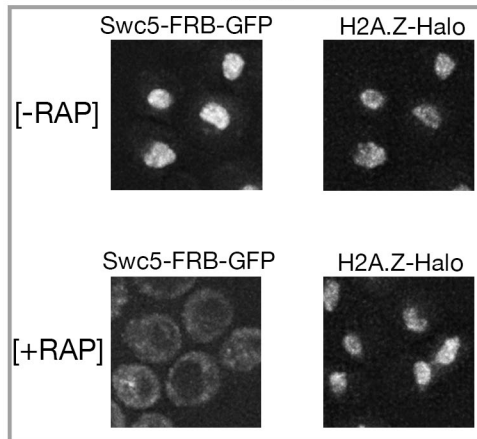**B****Rpb1-AA; Swc5-AA**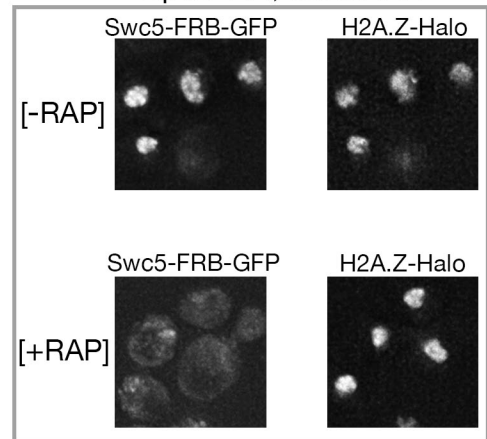**Fig. S3.1**

Supplement: supp [file elife-55667-supp-v1.zip]
